# Supplementary material
Source: publisher figshare collection journal article supplement (https://acs.figshare.com/ndownloader/files/3945931)
Supplement: Supplementary file 1 [file 3945931]

 
data_agho 
 
_audit_creation_method            SHELXL-97 
_chemical_name_systematic 
; 
 ? 
; 
_chemical_name_common             ? 
_chemical_melting_point           ? 
_chemical_formula_moiety          ? 
_chemical_formula_sum 
 'C24 H12 Ag Ho N4 O8' 
_chemical_formula_weight          757.18 
 
loop_ 
 _atom_type_symbol 
 _atom_type_description 
 _atom_type_scat_dispersion_real 
 _atom_type_scat_dispersion_imag 
 _atom_type_scat_source 
 'C'  'C'   0.0033   0.0016 
 'International Tables Vol C Tables 4.2.6.8 and 6.1.1.4' 
 'H'  'H'   0.0000   0.0000 
 'International Tables Vol C Tables 4.2.6.8 and 6.1.1.4' 
 'Ag'  'Ag'  -0.8971   1.1015 
 'International Tables Vol C Tables 4.2.6.8 and 6.1.1.4' 
 'Ho'  'Ho'  -0.2175   4.6783 
 'International Tables Vol C Tables 4.2.6.8 and 6.1.1.4' 
 'N'  'N'   0.0061   0.0033 
 'International Tables Vol C Tables 4.2.6.8 and 6.1.1.4' 
 'O'  'O'   0.0106   0.0060 
 'International Tables Vol C Tables 4.2.6.8 and 6.1.1.4' 
 
_symmetry_cell_setting            'monoclinic' 
_symmetry_space_group_name_H-M    'C 1 2/c 1'  
 
loop_ 
 _symmetry_equiv_pos_as_xyz 
 'x, y, z' 
 '-x, y, -z+1/2' 
 'x+1/2, y+1/2, z' 
 '-x+1/2, y+1/2, -z+1/2' 
 '-x, -y, -z' 
 'x, -y, z-1/2' 
 '-x+1/2, -y+1/2, -z' 
 'x+1/2, -y+1/2, z-1/2' 
 
_cell_length_a                    24.520(2) 
_cell_length_b                    12.1514(7) 
_cell_length_c                    7.4337(3) 
_cell_angle_alpha                 90.00 
_cell_angle_beta                  93.212(4) 
_cell_angle_gamma                 90.00 
_cell_volume                      2211.5(3) 
_cell_formula_units_Z             4 
_cell_measurement_temperature     293(2) 
_cell_measurement_reflns_used     2448  
_cell_measurement_theta_min       3.2766 
_cell_measurement_theta_max       29.2699  
 
_exptl_crystal_description        tubular  
_exptl_crystal_colour             flaxen 
_exptl_crystal_size_max           0.7 
_exptl_crystal_size_mid           0.3 
_exptl_crystal_size_min           0.07  
_exptl_crystal_density_meas       ? 
_exptl_crystal_density_diffrn     2.274 
_exptl_crystal_density_method     'not measured' 
_exptl_crystal_F_000              1448 
_exptl_absorpt_coefficient_mu     4.501 
_exptl_absorpt_correction_type    'multi-scan' 
_exptl_absorpt_correction_T_min   0.79089  
_exptl_absorpt_correction_T_max   1.0000 
_exptl_absorpt_process_details    ? 
 
_exptl_special_details 
; 
 ? 
; 
 
_diffrn_ambient_temperature       293(2) 
_diffrn_radiation_wavelength      0.71073 
_diffrn_radiation_type            MoK\a 
_diffrn_radiation_source          'fine-focus sealed tube' 
_diffrn_radiation_monochromator   graphite 
_diffrn_measurement_device_type   'Xcalibur, Eos, Gemini' 
_diffrn_measurement_method        '\w scans' 
_diffrn_detector_area_resol_mean  16.0971  
_diffrn_standards_number          ? 
_diffrn_standards_interval_count  ? 
_diffrn_standards_interval_time   ? 
_diffrn_standards_decay_%         ? 
_diffrn_reflns_number             4753 
_diffrn_reflns_av_R_equivalents   0.0227 
_diffrn_reflns_av_sigmaI/netI     0.0313 
_diffrn_reflns_limit_h_min        -30 
_diffrn_reflns_limit_h_max        21 
_diffrn_reflns_limit_k_min        -9 
_diffrn_reflns_limit_k_max        14 
_diffrn_reflns_limit_l_min        -9 
_diffrn_reflns_limit_l_max        9 
_diffrn_reflns_theta_min          3.28 
_diffrn_reflns_theta_max          25.99 
_reflns_number_total              2170 
_reflns_number_gt                 2085 
_reflns_threshold_expression      >2sigma(I) 
 
_computing_data_collection        ? 
_computing_cell_refinement        ? 
_computing_data_reduction         ? 
_computing_structure_solution     'SHELXS-97 (Sheldrick, 1990)' 
_computing_structure_refinement   'SHELXL-97 (Sheldrick, 1997)' 
_computing_molecular_graphics     ? 
_computing_publication_material   ? 
 
_refine_special_details 
; 
 Refinement of F^2^ against ALL reflections.  The weighted R-factor wR and 
 goodness of fit S are based on F^2^, conventional R-factors R are based 
 on F, with F set to zero for negative F^2^. The threshold expression of 
 F^2^ > 2sigma(F^2^) is used only for calculating R-factors(gt) etc. and is 
 not relevant to the choice of reflections for refinement.  R-factors based 
 on F^2^ are statistically about twice as large as those based on F, and R- 
 factors based on ALL data will be even larger. 
; 
 
_refine_ls_structure_factor_coef  Fsqd  
_refine_ls_matrix_type            full 
_refine_ls_weighting_scheme       calc  
_refine_ls_weighting_details 
 'calc w=1/[\s^2^(Fo^2^)+(0.0252P)^2^+0.3099P] where P=(Fo^2^+2Fc^2^)/3' 
_atom_sites_solution_primary      direct 
_atom_sites_solution_secondary    difmap 
_atom_sites_solution_hydrogens    geom 
_refine_ls_hydrogen_treatment     mixed 
_refine_ls_extinction_method      none 
_refine_ls_extinction_coef        ? 
_refine_ls_number_reflns          2170 
_refine_ls_number_parameters      174 
_refine_ls_number_restraints      0 
_refine_ls_R_factor_all           0.0222 
_refine_ls_R_factor_gt            0.0211 
_refine_ls_wR_factor_ref          0.0513 
_refine_ls_wR_factor_gt           0.0506 
_refine_ls_goodness_of_fit_ref    1.083 
_refine_ls_restrained_S_all       1.083 
_refine_ls_shift/su_max           0.001 
_refine_ls_shift/su_mean          0.000 
 
loop_ 
 _atom_site_label 
 _atom_site_type_symbol 
 _atom_site_fract_x 
 _atom_site_fract_y 
 _atom_site_fract_z 
 _atom_site_U_iso_or_equiv 
 _atom_site_adp_type 
 _atom_site_occupancy 
 _atom_site_symmetry_multiplicity 
 _atom_site_calc_flag 
 _atom_site_refinement_flags 
 _atom_site_disorder_assembly 
 _atom_site_disorder_group 
Ho1 Ho 0.5000 0.054919(17) 0.2500 0.01225(8) Uani 1 2 d S . . 
Ag1 Ag 0.2500 0.2500 -0.5000 0.03884(14) Uani 1 2 d S . . 
O1 O 0.47265(9) 0.0952(2) -0.4602(3) 0.0201(5) Uani 1 1 d . . . 
O4 O 0.43391(9) 0.1676(2) 0.1688(3) 0.0258(6) Uani 1 1 d . . . 
O2 O 0.42107(10) 0.0713(2) -0.2340(3) 0.0267(6) Uani 1 1 d . . . 
O3 O 0.42402(10) 0.3199(2) 0.0038(3) 0.0338(6) Uani 1 1 d . . . 
C11 C 0.43525(12) 0.1298(3) -0.3602(4) 0.0155(6) Uani 1 1 d . . . 
N2 N 0.28208(10) 0.1824(3) -0.2504(3) 0.0228(6) Uani 1 1 d . . . 
N1 N 0.34105(11) 0.3761(3) -0.3639(3) 0.0232(6) Uani 1 1 d . . . 
C12 C 0.40847(12) 0.2310(3) 0.0548(4) 0.0190(7) Uani 1 1 d . . . 
C3 C 0.43952(13) 0.3147(3) -0.5025(4) 0.0216(7) Uani 1 1 d . . . 
H3 H 0.4722 0.2938 -0.5503 0.026 Uiso 1 1 calc R . . 
C5 C 0.36406(12) 0.2789(3) -0.3205(3) 0.0157(6) Uani 1 1 d . . . 
C1 C 0.36826(15) 0.4428(3) -0.4700(5) 0.0285(8) Uani 1 1 d . . . 
H1 H 0.3528 0.5108 -0.4999 0.034 Uiso 1 1 calc R . . 
C2 C 0.41805(15) 0.4170(3) -0.5384(4) 0.0286(8) Uani 1 1 d . . . 
H2 H 0.4364 0.4677 -0.6067 0.034 Uiso 1 1 calc R . . 
C4 C 0.41218(12) 0.2423(3) -0.3946(4) 0.0163(7) Uani 1 1 d . . . 
C7 C 0.35315(12) 0.1877(3) -0.0152(4) 0.0187(7) Uani 1 1 d . . . 
C6 C 0.33278(11) 0.2136(3) -0.1900(4) 0.0157(6) Uani 1 1 d . . . 
C10 C 0.25146(13) 0.1247(4) -0.1400(4) 0.0310(9) Uani 1 1 d . . . 
H10 H 0.2164 0.1043 -0.1813 0.037 Uiso 1 1 calc R . . 
C8 C 0.32114(14) 0.1260(3) 0.0927(4) 0.0286(8) Uani 1 1 d . . . 
H8 H 0.3345 0.1056 0.2075 0.034 Uiso 1 1 calc R . . 
C9 C 0.26937(15) 0.0941(4) 0.0314(5) 0.0347(9) Uani 1 1 d . . . 
H9 H 0.2472 0.0532 0.1039 0.042 Uiso 1 1 calc R . . 
 
loop_ 
 _atom_site_aniso_label 
 _atom_site_aniso_U_11 
 _atom_site_aniso_U_22 
 _atom_site_aniso_U_33 
 _atom_site_aniso_U_23 
 _atom_site_aniso_U_13 
 _atom_site_aniso_U_12 
Ho1 0.01273(11) 0.01361(13) 0.01037(11) 0.000 0.00041(7) 0.000 
Ag1 0.0227(2) 0.0682(4) 0.02464(19) 0.0090(2) -0.00782(15) 0.0009(2) 
O1 0.0239(12) 0.0220(13) 0.0146(10) 0.0007(9) 0.0047(8) 0.0067(11) 
O4 0.0237(12) 0.0330(16) 0.0200(11) 0.0018(10) -0.0058(9) 0.0115(11) 
O2 0.0311(14) 0.0249(15) 0.0254(12) 0.0081(10) 0.0129(10) 0.0113(11) 
O3 0.0341(14) 0.0279(16) 0.0379(14) 0.0060(12) -0.0114(11) -0.0048(13) 
C11 0.0146(14) 0.0168(18) 0.0149(13) -0.0004(12) -0.0014(11) 0.0031(13) 
N2 0.0184(14) 0.0286(18) 0.0212(13) -0.0017(12) -0.0003(10) 0.0000(13) 
N1 0.0199(14) 0.0211(17) 0.0286(14) 0.0028(12) 0.0021(11) 0.0053(13) 
C12 0.0200(16) 0.022(2) 0.0150(14) -0.0021(13) 0.0008(11) 0.0072(15) 
C3 0.0227(16) 0.022(2) 0.0210(15) -0.0009(13) 0.0075(12) 0.0042(15) 
C5 0.0139(14) 0.0187(18) 0.0141(13) -0.0001(12) -0.0010(11) 0.0005(14) 
C1 0.030(2) 0.020(2) 0.036(2) 0.0070(15) 0.0027(15) 0.0078(16) 
C2 0.034(2) 0.022(2) 0.0302(18) 0.0084(16) 0.0079(15) -0.0001(17) 
C4 0.0159(15) 0.0172(18) 0.0157(14) -0.0019(12) -0.0008(11) 0.0015(13) 
C7 0.0167(15) 0.0221(19) 0.0175(14) 0.0023(13) 0.0028(11) 0.0083(14) 
C6 0.0112(14) 0.0183(18) 0.0179(14) -0.0016(13) 0.0025(11) 0.0038(13) 
C10 0.0160(16) 0.043(3) 0.0349(18) 0.0022(17) 0.0042(13) -0.0058(17) 
C8 0.0265(18) 0.035(2) 0.0246(17) 0.0099(16) 0.0021(13) 0.0028(18) 
C9 0.027(2) 0.038(3) 0.040(2) 0.0125(18) 0.0094(15) -0.0035(18) 
 
_geom_special_details 
; 
 All esds (except the esd in the dihedral angle between two l.s. planes) 
 are estimated using the full covariance matrix.  The cell esds are taken 
 into account individually in the estimation of esds in distances, angles 
 and torsion angles; correlations between esds in cell parameters are only 
 used when they are defined by crystal symmetry.  An approximate (isotropic) 
 treatment of cell esds is used for estimating esds involving l.s. planes. 
; 
 
loop_ 
 _geom_bond_atom_site_label_1 
 _geom_bond_atom_site_label_2 
 _geom_bond_distance 
 _geom_bond_site_symmetry_2 
 _geom_bond_publ_flag 
Ho1 O4 2.181(2) 2_655 ? 
Ho1 O4 2.181(2) . ? 
Ho1 O1 2.344(2) 2_654 ? 
Ho1 O1 2.344(2) 1_556 ? 
Ho1 O1 2.470(2) 6_556 ? 
Ho1 O1 2.470(2) 5_655 ? 
Ho1 O2 2.478(2) 6_556 ? 
Ho1 O2 2.478(2) 5_655 ? 
Ho1 C11 2.843(3) 6_556 ? 
Ho1 C11 2.843(3) 5_655 ? 
Ho1 Ho1 3.9492(2) 5_655 ? 
Ho1 Ho1 3.9492(2) 5_656 ? 
Ag1 N2 2.139(2) 7_554 ? 
Ag1 N2 2.139(2) . ? 
O1 C11 1.283(4) . ? 
O1 Ho1 2.344(2) 1_554 ? 
O1 Ho1 2.470(2) 5_655 ? 
O4 C12 1.281(4) . ? 
O2 C11 1.242(4) . ? 
O2 Ho1 2.478(2) 5_655 ? 
O3 C12 1.214(4) . ? 
C11 C4 1.496(5) . ? 
C11 Ho1 2.843(3) 5_655 ? 
N2 C10 1.341(4) . ? 
N2 C6 1.352(4) . ? 
N1 C1 1.336(4) . ? 
N1 C5 1.341(4) . ? 
C12 C7 1.520(4) . ? 
C3 C2 1.371(5) . ? 
C3 C4 1.388(4) . ? 
C3 H3 0.9300 . ? 
C5 C4 1.402(4) . ? 
C5 C6 1.498(4) . ? 
C1 C2 1.384(5) . ? 
C1 H1 0.9300 . ? 
C2 H2 0.9300 . ? 
C7 C8 1.376(5) . ? 
C7 C6 1.401(4) . ? 
C10 C9 1.375(5) . ? 
C10 H10 0.9300 . ? 
C8 C9 1.380(5) . ? 
C8 H8 0.9300 . ? 
C9 H9 0.9300 . ? 
 
loop_ 
 _geom_angle_atom_site_label_1 
 _geom_angle_atom_site_label_2 
 _geom_angle_atom_site_label_3 
 _geom_angle 
 _geom_angle_site_symmetry_1 
 _geom_angle_site_symmetry_3 
 _geom_angle_publ_flag 
O4 Ho1 O4 102.24(13) 2_655 . ? 
O4 Ho1 O1 82.94(8) 2_655 2_654 ? 
O4 Ho1 O1 82.00(8) . 2_654 ? 
O4 Ho1 O1 82.00(8) 2_655 1_556 ? 
O4 Ho1 O1 82.94(8) . 1_556 ? 
O1 Ho1 O1 155.90(12) 2_654 1_556 ? 
O4 Ho1 O1 144.10(8) 2_655 6_556 ? 
O4 Ho1 O1 96.72(8) . 6_556 ? 
O1 Ho1 O1 69.77(9) 2_654 6_556 ? 
O1 Ho1 O1 130.85(8) 1_556 6_556 ? 
O4 Ho1 O1 96.72(8) 2_655 5_655 ? 
O4 Ho1 O1 144.10(8) . 5_655 ? 
O1 Ho1 O1 130.85(8) 2_654 5_655 ? 
O1 Ho1 O1 69.77(9) 1_556 5_655 ? 
O1 Ho1 O1 84.79(10) 6_556 5_655 ? 
O4 Ho1 O2 161.04(8) 2_655 6_556 ? 
O4 Ho1 O2 80.30(9) . 6_556 ? 
O1 Ho1 O2 115.97(7) 2_654 6_556 ? 
O1 Ho1 O2 79.66(8) 1_556 6_556 ? 
O1 Ho1 O2 52.26(7) 6_556 6_556 ? 
O1 Ho1 O2 72.39(8) 5_655 6_556 ? 
O4 Ho1 O2 80.30(9) 2_655 5_655 ? 
O4 Ho1 O2 161.04(8) . 5_655 ? 
O1 Ho1 O2 79.66(8) 2_654 5_655 ? 
O1 Ho1 O2 115.97(7) 1_556 5_655 ? 
O1 Ho1 O2 72.39(8) 6_556 5_655 ? 
O1 Ho1 O2 52.26(7) 5_655 5_655 ? 
O2 Ho1 O2 103.49(12) 6_556 5_655 ? 
O4 Ho1 C11 165.85(9) 2_655 6_556 ? 
O4 Ho1 C11 91.23(9) . 6_556 ? 
O1 Ho1 C11 94.81(8) 2_654 6_556 ? 
O1 Ho1 C11 104.23(8) 1_556 6_556 ? 
O1 Ho1 C11 26.78(7) 6_556 6_556 ? 
O1 Ho1 C11 74.14(8) 5_655 6_556 ? 
O2 Ho1 C11 25.84(8) 6_556 6_556 ? 
O2 Ho1 C11 85.55(9) 5_655 6_556 ? 
O4 Ho1 C11 91.23(9) 2_655 5_655 ? 
O4 Ho1 C11 165.85(9) . 5_655 ? 
O1 Ho1 C11 104.23(8) 2_654 5_655 ? 
O1 Ho1 C11 94.81(8) 1_556 5_655 ? 
O1 Ho1 C11 74.14(8) 6_556 5_655 ? 
O1 Ho1 C11 26.78(7) 5_655 5_655 ? 
O2 Ho1 C11 85.55(9) 6_556 5_655 ? 
O2 Ho1 C11 25.84(8) 5_655 5_655 ? 
C11 Ho1 C11 75.73(12) 6_556 5_655 ? 
O4 Ho1 Ho1 115.70(6) 2_655 5_655 ? 
O4 Ho1 Ho1 89.46(5) . 5_655 ? 
O1 Ho1 Ho1 35.93(6) 2_654 5_655 ? 
O1 Ho1 Ho1 161.96(6) 1_556 5_655 ? 
O1 Ho1 Ho1 33.84(5) 6_556 5_655 ? 
O1 Ho1 Ho1 109.35(5) 5_655 5_655 ? 
O2 Ho1 Ho1 82.94(5) 6_556 5_655 ? 
O2 Ho1 Ho1 72.80(5) 5_655 5_655 ? 
C11 Ho1 Ho1 59.43(6) 6_556 5_655 ? 
C11 Ho1 Ho1 88.57(6) 5_655 5_655 ? 
O4 Ho1 Ho1 89.46(5) 2_655 5_656 ? 
O4 Ho1 Ho1 115.70(6) . 5_656 ? 
O1 Ho1 Ho1 161.96(6) 2_654 5_656 ? 
O1 Ho1 Ho1 35.93(6) 1_556 5_656 ? 
O1 Ho1 Ho1 109.35(5) 6_556 5_656 ? 
O1 Ho1 Ho1 33.84(5) 5_655 5_656 ? 
O2 Ho1 Ho1 72.80(5) 6_556 5_656 ? 
O2 Ho1 Ho1 82.94(5) 5_655 5_656 ? 
C11 Ho1 Ho1 88.57(6) 6_556 5_656 ? 
C11 Ho1 Ho1 59.43(6) 5_655 5_656 ? 
Ho1 Ho1 Ho1 140.495(11) 5_655 5_656 ? 
N2 Ag1 N2 180.00(13) 7_554 . ? 
C11 O1 Ho1 148.36(18) . 1_554 ? 
C11 O1 Ho1 93.07(18) . 5_655 ? 
Ho1 O1 Ho1 110.23(9) 1_554 5_655 ? 
C12 O4 Ho1 152.6(2) . . ? 
C11 O2 Ho1 93.75(18) . 5_655 ? 
O2 C11 O1 119.3(3) . . ? 
O2 C11 C4 122.2(3) . . ? 
O1 C11 C4 118.5(3) . . ? 
O2 C11 Ho1 60.41(17) . 5_655 ? 
O1 C11 Ho1 60.15(16) . 5_655 ? 
C4 C11 Ho1 166.0(2) . 5_655 ? 
C10 N2 C6 118.7(3) . . ? 
C10 N2 Ag1 122.7(2) . . ? 
C6 N2 Ag1 117.8(2) . . ? 
C1 N1 C5 117.4(3) . . ? 
O3 C12 O4 126.3(3) . . ? 
O3 C12 C7 119.4(3) . . ? 
O4 C12 C7 114.2(3) . . ? 
C2 C3 C4 119.6(3) . . ? 
C2 C3 H3 120.2 . . ? 
C4 C3 H3 120.2 . . ? 
N1 C5 C4 122.5(3) . . ? 
N1 C5 C6 113.5(3) . . ? 
C4 C5 C6 124.0(3) . . ? 
N1 C1 C2 124.0(3) . . ? 
N1 C1 H1 118.0 . . ? 
C2 C1 H1 118.0 . . ? 
C3 C2 C1 118.1(3) . . ? 
C3 C2 H2 120.9 . . ? 
C1 C2 H2 120.9 . . ? 
C3 C4 C5 118.1(3) . . ? 
C3 C4 C11 119.1(3) . . ? 
C5 C4 C11 122.8(3) . . ? 
C8 C7 C6 118.5(3) . . ? 
C8 C7 C12 121.1(3) . . ? 
C6 C7 C12 120.3(3) . . ? 
N2 C6 C7 121.2(3) . . ? 
N2 C6 C5 115.4(2) . . ? 
C7 C6 C5 123.4(3) . . ? 
N2 C10 C9 123.2(3) . . ? 
N2 C10 H10 118.4 . . ? 
C9 C10 H10 118.4 . . ? 
C7 C8 C9 120.3(3) . . ? 
C7 C8 H8 119.9 . . ? 
C9 C8 H8 119.9 . . ? 
C10 C9 C8 118.1(3) . . ? 
C10 C9 H9 121.0 . . ? 
C8 C9 H9 121.0 . . ? 
 
_diffrn_measured_fraction_theta_max    0.999 
_diffrn_reflns_theta_full              25.99 
_diffrn_measured_fraction_theta_full   0.999 
_refine_diff_density_max    0.529 
_refine_diff_density_min   -0.873 
_refine_diff_density_rms    0.116 
